# Supplementary material for: Genes associated with Type 2 Diabetes and vascular complications
Source: publisher site journal article supplement (doi:10.18632/aging.101375), 2018-02-04
Supplement: Supplementary file [file aging-v10i2-101375-supplementary-material-SD1.pdf]

**SUPPLEMENTARY MATERIAL**

**Table S1. Basic characteristics of 40 genotyped SNPs in candidate genes and their associated traits.**

| Gene                      | SNP        | CHR | Mutation Type                                                          | Known associations of interest             | References                          |
|---------------------------|------------|-----|------------------------------------------------------------------------|--------------------------------------------|-------------------------------------|
| <i>ADIPOQ</i>             | rs266729   | 3   | Upstream gene variant                                                  | Nephropathy and Retinopathy in T2D         | Cai et al. 2015; Li et al. 2015     |
| <i>ADIPOQ, ADIPOQ-ASI</i> | rs1063539  | 3   | 3'UTR variant, Upstream gene variant                                   | Diabetes mellitus and Hypertension         | Tong et al. 2013; Jiang et al. 2014 |
| <i>APOE</i>               | rs440446   | 19  | Missense variant                                                       | Not associated to T2D                      | Geng et al. 2011                    |
| <i>CAT</i>                | rs1001179  | 11  | Upstream gene variant                                                  | Oxidative stress, Type 2 Diabetes          | Pacal et al. 2011                   |
| <i>CLPTMIL</i>            | rs401681   | 5   | Upstream variant 2KB                                                   | Pancreatic cancer, T2D                     | Wu et al. 2015                      |
| <i>DDAHI</i>              | rs669173   | 1   | Intron variant, Non coding transcript variant, Downstream gene variant | ADMA(Asymmetric dimethylarginine) levels   | Abhary et al. 2010                  |
| <i>DDAHI</i>              | rs13373844 | 1   | Intron variant, Non coding transcript variant                          | ADMA(Asymmetric dimethylarginine) levels   | Abhary et al. 2010                  |
| <i>DDAHI</i>              | rs7521189  | 1   | Intron variant, Non coding transcript variant                          | ADMA(Asymmetric dimethylarginine) levels   | Abhary et al. 2010                  |
| <i>EPO</i>                | rs1617640  | 7   | Upstream variant 2KB                                                   | Diabetic Retinopathy, Diabetic Nephropathy | Tong et al. 2008                    |
| <i>EPO</i>                | rs507392   | 7   | Intron variant                                                         | Diabetic Retinopathy, Diabetic Nephropathy | Tong et al. 2008                    |
| <i>EPO</i>                | rs551238   | 7   | Downstream gene variant 500B                                           | Diabetic Retinopathy, Diabetic Nephropathy | Tong et al. 2008                    |
| <i>FTO</i>                | rs1121980  | 16  | Intron variant, NMD transcript variant, Non coding transcript variant  | Susceptibility to Type 2 Diabetes, Obesity | Li et al. 2011                      |
| <i>FTO</i>                | rs1421085  | 16  | Intron variant, NMD transcript variant, Non coding transcript variant  | BMI and Type 2 Diabetes                    | Akiyama et al. 2014                 |
| <i>FTO</i>                | rs17817449 | 16  | Intron variant, NMD transcript variant, Non coding transcript variant  | Susceptibility to Type 2 Diabetes, Obesity | Basile et al. 2014                  |
| <i>FTO</i>                | rs8047395  | 16  | Intron variant, NMD transcript variant, Non coding transcript variant  | Susceptibility to Type 2 Diabetes, Obesity | Akiyama et al. 2014                 |
| <i>FTO</i>                | rs8050136  | 16  | Intron variant, NMD transcript variant, Non coding transcript variant  | Susceptibility to Type 2 Diabetes          | Chang et al. 2014                   |
| <i>FTO</i>                | rs9939609  | 16  | Intron variant, NMD transcript variant, Non coding transcript variant  | BMI and Type 2 Diabetes                    | Akiyama et al. 2014                 |

|                |            |    |                                      |                                                                     |                                                                              |
|----------------|------------|----|--------------------------------------|---------------------------------------------------------------------|------------------------------------------------------------------------------|
| <i>HIF1A</i>   | rs11549465 | 14 | Missense variant                     | Susceptibility to Type 1 and Type 2 Diabetes                        | Nagy et al. 2009                                                             |
| <i>IGF2BP2</i> | rs1470579  | 3  | Intron variant                       | Susceptibility to Type 2 Diabetes                                   | Park et al. 2015                                                             |
| <i>IGF2BP2</i> | rs4402960  | 3  | Intron variant                       | Susceptibility to Type 2 Diabetes                                   | Scott et al. 2007; The Wellcome Trust Case Control 2007; Zeggini et al. 2007 |
| <i>IRS1</i>    | rs2943641  | 2  | Intergenic variant (500 kb upstream) | Insulin resistance and Hyperinsulinemia                             | Rung et al. 2009                                                             |
| <i>KCNJ11</i>  | rs5215     | 11 | Missense variant                     | Susceptibility to Type 2 Diabetes                                   | Zeggini et al. 2008                                                          |
| <i>KCNQ1</i>   | rs2237892  | 11 | Intron variant                       | Susceptibility to Type 2 Diabetes                                   | Kong et al. 2009                                                             |
| <i>SLC30A8</i> | rs13266634 | 8  | Missense variant                     | Susceptibility to Type 2 Diabetes                                   | Sladek et al. 2007                                                           |
| <i>SLC30A8</i> | rs16889462 | 8  | Missense variant                     | Susceptibility to Type 2 Diabetes                                   | Labruna et al. 2011; Sun et al. 2014                                         |
| <i>SOD2</i>    | rs4880     | 6  | Missense variant                     | Diabetic Nephropathy                                                | Mollsten et al. 2007                                                         |
| <i>TCF7L2</i>  | rs7901695  | 10 | Intron variant                       | Susceptibility to Type 2 Diabetes                                   | Scott et al. 2007; The Wellcome Trust Case Control 2007; Zeggini et al. 2007 |
| <i>TCF7L2</i>  | rs7903146  | 10 | Intron variant                       | Susceptibility to Type 2 Diabetes                                   | Grant et al. 2006                                                            |
| <i>TERC</i>    | rs12696304 | 3  | Downstream gene variant (1.5 kb)     | Human Leukocyte Telomere Length and the Risk of T2D                 | Codd et al. 2010; Al Khaldi et al. 2015                                      |
| <i>TERT</i>    | rs2735940  | 5  | Upstream variant 2KB                 | Susceptibility to Breast cancer                                     | Pellatt et al. 2013                                                          |
| <i>TERT</i>    | rs2736098  | 5  | Synonymous variant                   | Cancer, T2D, leukocyte telomere length                              | You et al. 2012, Wu et al. 2015                                              |
| <i>TERT</i>    | rs2736109  | 5  | Upstream variant 2KB                 | Telomere lengths, Susceptibility to Breast and Ovarian cancer       | Bojesen et al. 2013                                                          |
| <i>TERT</i>    | rs2853669  | 5  | Upstream variant 2KB                 | Susceptibility to Type 2 Diabetes                                   | You et al. 2012,                                                             |
| <i>UCP1</i>    | rs1800592  | 4  | Upstream gene variant                | Abdominal Fat, Blood pressure, Retinopathy, Insulin resistance, T2D | Fukuyama et al. 2006; Cha et al. 2008; Ho Cha et al. 2008; Zhang et al. 2015 |
| <i>UCP1</i>    | rs3811787  | 4  | Upstream gene variant                | Abdominal Fat, Obesity                                              | Ho Cha et al. 2008, Labruna et al. 2011                                      |

|              |            |    |                                                                                                            |                                            |                                         |
|--------------|------------|----|------------------------------------------------------------------------------------------------------------|--------------------------------------------|-----------------------------------------|
| <i>UCP1</i>  | rs3811791  | 4  | Upstream gene variant                                                                                      | Susceptibility to Type 2 Diabetes          | Lee et al. 2008                         |
| <i>UCP1</i>  | rs45539933 | 4  | Missense variant                                                                                           | Blood pressure, Obesity                    | Cha et al. 2008,<br>Labruna et al. 2011 |
| <i>UCP2</i>  | rs660339   | 11 | Missense variant                                                                                           | Diabetic Retinopathy                       | Crispim et al. 2010                     |
| <i>UCP3</i>  | rs1800849  | 11 | 5'UTR variant                                                                                              | Age, Type 2 Diabetes,<br>Abdominal Obesity | Pinelli et al. 2006                     |
| <i>VEGFA</i> | rs3025021  | 6  | Intron variant, Non coding transcript variant, Non coding transcript exon variant, downstream gene variant | Diabetic Retinopathy                       | Abhary et al. 2010,                     |

## REFERENCES

- Abhary S, Burdon KP, Casson RJ, Goggin M, Petrovsky NP, Craig JE. Association between erythropoietin gene polymorphisms and diabetic retinopathy. *Arch Ophthalmol.* 2010; 128:102–06. <https://doi.org/10.1001/archophthalmol.2009.355>
- Abhary S, Burdon KP, Kuot A, Javadiyan S, Whiting MJ, Kasmeridis N, Petrovsky N, Craig JE. Sequence variation in *DDAH1* and *DDAH2* genes is strongly and additively associated with serum ADMA concentrations in individuals with type 2 diabetes. *PLoS One.* 2010; 5:e9462. <https://doi.org/10.1371/journal.pone.0009462>
- Abhary S, Burdon KP, Kuot A, Javadiyan S, Whiting MJ, Kasmeridis N, Petrovsky N, Craig JE. Sequence variation in *DDAH1* and *DDAH2* genes is strongly and additively associated with serum ADMA concentrations in individuals with type 2 diabetes. *PLoS One.* 2010; 5:e9462. <https://doi.org/10.1371/journal.pone.0009462>
- Akiyama K, Takeuchi F, Isono M, Chakrawarthy S, Nguyen QN, Wen W, Yamamoto K, Katsuya T, Kasturiratne A, Pham ST, Zheng W, Matsushita Y, Kishimoto M, et al. Systematic fine-mapping of association with BMI and type 2 diabetes at the *FTO* locus by integrating results from multiple ethnic groups. *PLoS One.* 2014; 9:e101329. <https://doi.org/10.1371/journal.pone.0101329>
- Al Khaldi R, Mojiminiyi O, AlMulla F, Abdella N. Associations of *TERT* Single Nucleotide Polymorphisms with Human Leukocyte Telomere Length and the Risk of Type 2 Diabetes Mellitus. *PLoS One.* 2015; 10:e0145721. <https://doi.org/10.1371/journal.pone.0145721>
- Basile KJ, Johnson ME, Xia Q, Grant SF. Genetic susceptibility to type 2 diabetes and obesity: follow-up of findings from genome-wide association studies. *Int J Endocrinol.* 2014; 2014:769671. <https://doi.org/10.1155/2014/769671>
- Bojesen SE, Pooley KA, Johnatty SE, Beesley J, Michailidou K, Tyrer JP, Edwards SL, Pickett HA, Shen HC, Smart CE, Hillman KM, Mai PL, Lawrenson K, Stutz MD, et al. Multiple independent variants at the *TERT* locus are associated with telomere length and risks of breast and ovarian cancer. *Nature genetics.* 2013; 45: 371-384e372.
- Cai Y, Zeng T, Chen L. Association of adiponectin polymorphisms with the risk of diabetic nephropathy in type 2 diabetes: a meta-analysis. *J Diabetes.* 2015; 7:31–40. <https://doi.org/10.1111/1753-0407.12166>
- Cha MH, Kang BK, Suh D, Kim KS, Yang Y, Yoon Y. Association of *UCP1* genetic polymorphisms with blood pressure among Korean female subjects. *J Korean Med Sci.* 2008; 23:776–80. <https://doi.org/10.3346/jkms.2008.23.5.776>
- Chang YC, Liu PH, Yu YH, Kuo SS, Chang TJ, Jiang YD, Nong JY, Hwang JJ, Chuang LM. Validation of type 2 diabetes risk variants identified by genome-wide association studies in Han Chinese population: a replication study and meta-analysis. *PLoS One.* 2014; 9:e95045. <https://doi.org/10.1371/journal.pone.0095045>
- Codd V, Mangino M, van der Harst P, Braund PS, Kaiser M, Beveridge AJ, Rafelt S, Moore J, Nelson C,

- Soranzo N, Zhai G, Valdes AM, Blackburn H, et al, and Wellcome Trust Case Control Consortium. Common variants near TERC are associated with mean telomere length. *Nat Genet.* 2010; 42:197–99. <https://doi.org/10.1038/ng.532>
12. Crispim D, Fagundes NJ, dos Santos KG, Rheinheimer J, Bouças AP, de Souza BM, Macedo GS, Leiria LB, Gross JL, Canani LH. Polymorphisms of the UCP2 gene are associated with proliferative diabetic retinopathy in patients with diabetes mellitus. *Clin Endocrinol (Oxf).* 2010; 72:612–19. <https://doi.org/10.1111/j.1365-2265.2009.03684.x>
  13. Fukuyama K, Ohara T, Hirota Y, Maeda K, Kuno S, Zenibayashi M, Teranishi T, Kouyama K, Maeda E, Sakamoto N, Kasuga M. Association of the -112A>C polymorphism of the uncoupling protein 1 gene with insulin resistance in Japanese individuals with type 2 diabetes. *Biochem Biophys Res Commun.* 2006; 339:1212–16. <https://doi.org/10.1016/j.bbrc.2005.11.140>
  14. Geng H, Law PP, Ng MC, Li T, Liang LY, Ge TF, Wong KB, Liang C, Ma RC, So WY, Chan JC, Ho YY. APOE genotype-function relationship: evidence of -491 A/T promoter polymorphism modifying transcription control but not type 2 diabetes risk. *PLoS One.* 2011; 6:e24669. <https://doi.org/10.1371/journal.pone.0024669>
  15. Grant SF, Thorleifsson G, Reynisdottir I, Benediktsson R, Manolescu A, Sainz J, Helgason A, Stefansson H, Emilsson V, Helgadottir A, Styrkarsdottir U, Magnusson KP, Walters GB, et al. Variant of transcription factor 7-like 2 (TCF7L2) gene confers risk of type 2 diabetes. *Nat Genet.* 2006; 38:320–23. <https://doi.org/10.1038/ng1732>
  16. Cha MH, Kim KS, Suh D, Chung SI, Yoon Y. A UCP1-412A>C polymorphism is associated with abdominal fat area in Korean women. *Hereditas.* 2008; 145:231–37. <https://doi.org/10.1111/j.1601-5223.2008.02071.x>
  17. Jiang B, Liu Y, Liu Y, Fang F, Wang X, Li B. Association of four insulin resistance genes with type 2 diabetes mellitus and hypertension in the Chinese Han population. *Mol Biol Rep.* 2014; 41:925–33. <https://doi.org/10.1007/s11033-013-2937-0>
  18. Kong A, Steinthorsdottir V, Masson G, Thorleifsson G, Sulem P, Besenbacher S, Jonasdottir A, Sigurdsson A, Kristinsson KT, Jonasdottir A, Frigge ML, Gylfason A, Olason PI, et al, and DIAGRAM Consortium. Parental origin of sequence variants associated with complex diseases. *Nature.* 2009; 462:868–74. <https://doi.org/10.1038/nature08625>
  19. Labruna G, Pasanisi F, Fortunato G, Nardelli C, Finelli C, Farinaro E, Contaldo F, Sacchetti L. Sequence Analysis of the UCP1 Gene in a Severe Obese Population from Southern Italy. *J Obes.* 2011; 2011:269043. <https://doi.org/10.1155/2011/269043>
  20. Lee HJ, Ryu HJ, Shin HD, Park BL, Kim JY, Cho YM, Park KS, Song J, Oh B. Associations between polymorphisms in the mitochondrial uncoupling proteins (UCPs) with T2DM. *Clin Chim Acta.* 2008; 398:27–33. <https://doi.org/10.1016/j.cca.2008.07.029>
  21. Li S, Zhao JH, Luan J, Langenberg C, Luben RN, Khaw KT, Wareham NJ, Loos RJ. Genetic predisposition to obesity leads to increased risk of type 2 diabetes. *Diabetologia.* 2011; 54:776–82. <https://doi.org/10.1007/s00125-011-2044-5>
  22. Li Y, Wu QH, Jiao ML, Fan XH, Hu Q, Hao YH, Liu RH, Zhang W, Cui Y, Han LY. Gene-environment interaction between adiponectin gene polymorphisms and environmental factors on the risk of diabetic retinopathy. *J Diabetes Investig.* 2015; 6:56–66. <https://doi.org/10.1111/jdi.12249>
  23. Möllsten A, Marklund SL, Wessman M, Svensson M, Forsblom C, Parkkonen M, Brismar K, Groop PH, Dahlquist G. A functional polymorphism in the manganese superoxide dismutase gene and diabetic nephropathy. *Diabetes.* 2007; 56:265–69. <https://doi.org/10.2337/db06-0698>
  24. Nagy G, Kovacs-Nagy R, Kereszturi E, Somogyi A, Szekely A, Nemeth N, Hosszifulusi N, Panczel P, Ronai Z, Sasvari-Szekely M. Association of hypoxia inducible factor-1 alpha gene polymorphism with both type 1 and type 2 diabetes in a Caucasian (Hungarian) sample. *BMC Med Genet.* 2009; 10:79. <https://doi.org/10.1186/1471-2350-10-79>
  25. Pácal L, Varvařovská J, Ruřavý Z, Lacigová S, Stětina R, Racek J, Pomahačová R, Tanhäuserová V, Kařková K. Parameters of oxidative stress, DNA damage and DNA repair in type 1 and type 2 diabetes mellitus. *Arch Physiol Biochem.* 2011; 117:222–30. <https://doi.org/10.3109/13813455.2010.551135>
  26. Park HY, Choi HJ, Hong YC. Utilizing Genetic Predisposition Score in Predicting Risk of Type 2 Diabetes Mellitus Incidence: A Community-based Cohort Study on Middle-aged Koreans. *J Korean Med Sci.* 2015; 30:1101–09. <https://doi.org/10.3346/jkms.2015.30.8.1101>
  27. Pellatt AJ, Wolff RK, Torres-Mejia G, John EM, Herrick JS, Lundgreen A, Baumgartner KB, Giuliano AR, Hines LM, Fejerman L, Cawthon R, Slattery ML. Telomere length, telomere-related genes, and breast cancer risk: the breast cancer health disparities study. *Genes Chromosomes Cancer.* 2013; 52:595–609.

<https://doi.org/10.1002/gcc.22056>

28. Pinelli M, Giacchetti M, Acquaviva F, Coccozza S, Donnarumma G, Lapice E, Riccardi G, Romano G, Vaccaro O, Monticelli A. Beta2-adrenergic receptor and UCP3 variants modulate the relationship between age and type 2 diabetes mellitus. *BMC Med Genet.* 2006; 7:85. <https://doi.org/10.1186/1471-2350-7-85>
29. Rung J, Cauchi S, Albrechtsen A, Shen L, Rocheleau G, Cavalcanti-Proença C, Bacot F, Balkau B, Belisle A, Borch-Johnsen K, Charpentier G, Dina C, Durand E, et al. Genetic variant near IRS1 is associated with type 2 diabetes, insulin resistance and hyperinsulinemia. *Nat Genet.* 2009; 41:1110–15. <https://doi.org/10.1038/ng.443>
30. Scott LJ, Mohlke KL, Bonnycastle LL, Willer CJ, Li Y, Duren WL, Erdos MR, Stringham HM, Chines PS, Jackson AU, Prokunina-Olsson L, Ding CJ, Swift AJ, et al. A genome-wide association study of type 2 diabetes in Finns detects multiple susceptibility variants. *Science.* 2007; 316:1341–45. <https://doi.org/10.1126/science.1142382>
31. Sladek R, Rocheleau G, Rung J, Dina C, Shen L, Serre D, Boutin P, Vincent D, Belisle A, Hadjadj S, Balkau B, Heude B, Charpentier G, et al. A genome-wide association study identifies novel risk loci for type 2 diabetes. *Nature.* 2007; 445:881–85. <https://doi.org/10.1038/nature05616>
32. Sun X, Yu W, Hu C. Genetics of type 2 diabetes: insights into the pathogenesis and its clinical application. *BioMed Res Int.* 2014; 2014:926713. <https://doi.org/10.1155/2014/926713>
33. Wellcome Trust Case Control Consortium. Genome-wide association study of 14,000 cases of seven common diseases and 3,000 shared controls. *Nature.* 2007; 447:661–78. <https://doi.org/10.1038/nature05911>
34. Tong Z, Yang Z, Patel S, Chen H, Gibbs D, Yang X, Hau VS, Kaminoh Y, Harmon J, Pearson E, Buehler J, Chen Y, Yu B, et al. D. Genetics of, G. Diabetic Complication Study, L. B. Jorde, D. Y. Li, L. P. Aiello, M. R. Pollak and K. Zhang. Promoter polymorphism of the erythropoietin gene in severe diabetic eye and kidney complications. *Proceedings of the National Academy of Sciences of the United States of America.* 2008. 105: 6998-7003.
35. Tong G, Wang N, Leng J, Tong X, Shen Y, Yang J, Ye X, Zhou L, Zhou Y. Common variants in adiponectin gene are associated with coronary artery disease and angiographical severity of coronary atherosclerosis in type 2 diabetes. *Cardiovasc Diabetol.* 2013; 12:67–67. <https://doi.org/10.1186/1475-2840-12-67>
36. Wu L, Rabe KG, Petersen GM. Do variants associated with susceptibility to pancreatic cancer and type 2 diabetes reciprocally affect risk? *PLoS One.* 2015; 10:e0117230. <https://doi.org/10.1371/journal.pone.0117230>
37. You NC, Chen BH, Song Y, Lu X, Chen Y, Manson JE, Kang M, Howard BV, Margolis KL, Curb JD, Phillips LS, Stefanick ML, Tinker LF, Liu S. A prospective study of leukocyte telomere length and risk of type 2 diabetes in postmenopausal women. *Diabetes.* 2012; 61:2998–3004. <https://doi.org/10.2337/db12-0241>
38. Zeggini E, Weedon MN, Lindgren CM, Frayling TM, Elliott KS, Lango H, Timpson NJ, Perry JR, Rayner NW, Freathy RM, Barrett JC, Shields B, Morris AP, et al, and Wellcome Trust Case Control Consortium (WTCCC). Replication of genome-wide association signals in UK samples reveals risk loci for type 2 diabetes. *Science.* 2007; 316:1336–41. <https://doi.org/10.1126/science.1142364>
39. Zeggini E, Scott LJ, Saxena R, Voight BF, Marchini JL, Hu T, de Bakker PI, Abecasis GR, Almgren P, Andersen G, Ardlie K, Boström KB, Bergman RN, et al, and Wellcome Trust Case Control Consortium. Meta-analysis of genome-wide association data and large-scale replication identifies additional susceptibility loci for type 2 diabetes. *Nat Genet.* 2008; 40:638–45. <https://doi.org/10.1038/ng.120>
40. Zhang Y, Meng N, Lv Z, Li H, Qu Y. The gene polymorphisms of UCP1 but not PPAR  $\gamma$  and TCF7L2 are associated with diabetic retinopathy in Chinese type 2 diabetes mellitus cases. *Acta Ophthalmol.* 2015; 93:e223–29. <https://doi.org/10.1111/aos.12542>

**Table S2. Association analysis of candidate SNPs with diabetic microvascular and macrovascular complications.**

| Gene                     | SNP        | Alleles | MAF  | Retinopathy              |         | Nephropathy              |         | Neuropathy               |         | Ischemic heart disease and stroke |         |
|--------------------------|------------|---------|------|--------------------------|---------|--------------------------|---------|--------------------------|---------|-----------------------------------|---------|
|                          |            |         |      | OR (95% CI) <sup>a</sup> | P-value | OR (95% CI) <sup>a</sup> | P-value | OR (95% CI) <sup>a</sup> | P-value | OR (95% CI) <sup>a</sup>          | P-value |
| ADIPOQ                   | rs266729   | C/G     | 0.24 | 1.10 (0.74-1.63)         | 0.641   | 1.1 (0.70-1.73)          | 0.672   | 0.9 (0.58-1.38)          | 0.616   | 0.61 (0.39-0.95)                  | 0.024   |
| ADIPOQ-AS1               | rs1063539  | G/C     | 0.10 | 0.60 (0.30-1.22)         | 0.143   | 0.91 (0.43-1.90)         | 0.795   | 0.46 (0.19-1.12)         | 0.065   | 0.83 (0.43-1.64)                  | 0.592   |
| APOE                     | rs440446   | G/C     | 0.39 | 1.13 (0.79-1.62)         | 0.510   | 1.12 (0.73-1.71)         | 0.617   | 1.06 (0.71-1.59)         | 0.760   | 1.16 (0.81-1.67)                  | 0.425   |
| CAT                      | rs1001179  | G/A     | 0.22 | 1.03 (0.66-1.63)         | 0.885   | 0.48 (0.26-0.87)         | 0.010   | 0.93 (0.56-1.52)         | 0.760   | 1.03 (0.66-1.6)                   | 0.905   |
| CLPTM1L                  | rs401681   | C/T     | 0.40 | 1.10 (0.76-1.58)         | 0.627   | 1.33 (0.86-2.04)         | 0.197   | 0.95 (0.64-1.41)         | 0.792   | 0.95 (0.65-1.38)                  | 0.794   |
| DDAH1                    | rs13373844 | A/C     | 0.35 | 1.19 (0.82-1.71)         | 0.366   | 0.88 (0.57-1.35)         | 0.547   | 1.13 (0.77-1.67)         | 0.533   | 0.92 (0.63-1.33)                  | 0.654   |
| DDAH1                    | rs7521189  | A/G     | 0.46 | 1.09 (0.76-1.57)         | 0.624   | 0.95 (0.62-1.44)         | 0.800   | 1.18 (0.8-1.75)          | 0.403   | 1.09 (0.76-1.56)                  | 0.641   |
| EPO                      | rs1617640  | T/G     | 0.32 | 0.95 (0.65-1.39)         | 0.804   | 0.89 (0.57-1.37)         | 0.585   | 1.36 (0.92-2.02)         | 0.128   | 1.01 (0.70-1.47)                  | 0.948   |
| EPO                      | rs507392   | T/C     | 0.32 | 0.92 (0.62-1.35)         | 0.665   | 0.92 (0.59-1.43)         | 0.713   | 1.38 (0.93-2.06)         | 0.114   | 1.08 (0.73-1.58)                  | 0.709   |
| EPO                      | rs551238   | A/C     | 0.32 | 0.95 (0.65-1.39)         | 0.804   | 0.89 (0.57-1.37)         | 0.585   | 1.36 (0.92-2.02)         | 0.128   | 1.01 (0.70-1.47)                  | 0.948   |
| FTO                      | rs1121980  | C/T     | 0.48 | 1.01 (0.70-1.44)         | 0.976   | 0.64 (0.42-0.96)         | 0.030   | 1.15 (0.79-1.67)         | 0.461   | 0.97 (0.68-1.38)                  | 0.875   |
| FTO                      | rs1421085  | T/C     | 0.47 | 0.97 (0.68-1.38)         | 0.864   | 0.63 (0.42-0.95)         | 0.026   | 1.25 (0.86-1.82)         | 0.240   | 0.95 (0.67-1.35)                  | 0.783   |
| FTO                      | rs17817449 | T/G     | 0.45 | 1.08 (0.76-1.53)         | 0.684   | 0.66 (0.44-0.98)         | 0.044   | 1.07 (0.74-1.55)         | 0.704   | 0.97 (0.69-1.37)                  | 0.866   |
| FTO                      | rs8050136  | C/A     | 0.45 | 1.10 (0.77-1.57)         | 0.594   | 0.68 (0.45-1.03)         | 0.068   | 1.11 (0.76-1.61)         | 0.590   | 0.98 (0.69-1.39)                  | 0.907   |
| FTO                      | rs9939609  | T/A     | 0.45 | 1.06 (0.74-1.52)         | 0.739   | 0.67 (0.45-1.02)         | 0.057   | 1.09 (0.75-1.58)         | 0.644   | 0.99 (0.70-1.41)                  | 0.974   |
| HIF1A                    | rs11549465 | C/T     | 0.15 | 1.24 (0.75-2.05)         | 0.398   | 0.95 (0.53-1.71)         | 0.860   | 0.9 (0.52-1.57)          | 0.708   | 1.50 (0.93-2.41)                  | 0.101   |
| IGF2BP2                  | rs4402960  | G/T     | 0.37 | 1.32 (0.92-1.89)         | 0.133   | 1.04 (0.68-1.59)         | 0.854   | 1.10 (0.74-1.64)         | 0.63    | 1.23 (0.86-1.77)                  | 0.262   |
| IRS1 (500 kb downstream) | rs2943641  | C/T     | 0.40 | 1.22 (0.86-1.75)         | 0.267   | 1.03 (0.69-1.56)         | 0.871   | 0.71 (0.48-1.06)         | 0.086   | 0.93 (0.65-1.34)                  | 0.712   |
| KCNJ11                   | rs5215     | T/C     | 0.34 | 1.14 (0.79-1.63)         | 0.483   | 1.17 (0.77-1.77)         | 0.463   | 0.78 (0.52-1.16)         | 0.209   | 0.89 (0.61-1.29)                  | 0.527   |
| KCNQ1                    | rs2237892  | C/T     | 0.05 | 0.80 (0.33-1.91)         | 0.603   | 1.03 (0.41-2.57)         | 0.951   | 2.06 (0.95-4.45)         | 0.076   | 0.70 (0.29-1.73)                  | 0.429   |
| TCF7L2                   | rs7903146  | C/T     | 0.44 | 0.70 (0.47-1.03)         | 0.070   | 1.21 (0.79-1.86)         | 0.373   | 0.84 (0.55-1.27)         | 0.399   | 0.97 (0.67-1.40)                  | 0.866   |
| TERC                     | rs12696304 | C/G     | 0.27 | 0.86 (0.58-1.25)         | 0.420   | 1.20 (0.78-1.84)         | 0.410   | 0.72 (0.47-1.11)         | 0.125   | 0.89 (0.61-1.32)                  | 0.573   |
| TERT                     | rs2735940  | T/C     | 0.42 | 1.14 (0.78-1.67)         | 0.498   | 1.22 (0.79-1.87)         | 0.374   | 0.72 (0.47-1.09)         | 0.116   | 1.28 (0.88-1.87)                  | 0.191   |
| TERT                     | rs2736098  | G/A     | 0.29 | 1.01 (0.65-1.56)         | 0.973   | 0.69 (0.41-1.16)         | 0.151   | 1.48 (0.92-2.38)         | 0.105   | 1.08 (0.70-1.67)                  | 0.726   |
| TERT                     | rs2736109  | G/A     | 0.41 | 1.04 (0.71-1.51)         | 0.844   | 0.69 (0.44-1.09)         | 0.108   | 0.94 (0.63-1.42)         | 0.781   | 1.07 (0.73-1.57)                  | 0.726   |
| UCP1                     | rs1800592  | A/G     | 0.24 | 0.84 (0.55-1.29)         | 0.426   | 0.57 (0.33-0.98)         | 0.031   | 0.86 (0.54-1.36)         | 0.509   | 1.10 (0.74-1.64)                  | 0.643   |

|       |            |     |      |                  |       |                  |       |                  |       |                  |       |
|-------|------------|-----|------|------------------|-------|------------------|-------|------------------|-------|------------------|-------|
| UCP1  | rs3811787  | T/G | 0.25 | 1.20 (0.80-1.79) | 0.382 | 0.57 (0.34-0.98) | 0.031 | 1.02 (0.66-1.57) | 0.945 | 1.20 (0.81-1.77) | 0.367 |
| UCP1  | rs45539933 | C/T | 0.06 | 0.31 (0.12-0.82) | 0.010 | 0.52 (0.18-1.52) | 0.198 | 1.46 (0.68-3.13) | 0.340 | 1.08 (0.52-2.26) | 0.837 |
| UCP2  | rs660339   | C/T | 0.34 | 0.79 (0.54-1.15) | 0.211 | 1.43 (0.93-2.18) | 0.102 | 1.03 (0.69-1.55) | 0.882 | 0.91 (0.62-1.34) | 0.635 |
| UCP3  | rs1800849  | C/T | 0.14 | 0.88 (0.52-1.49) | 0.627 | 1.72 (0.99-2.99) | 0.060 | 1.13 (0.65-1.97) | 0.660 | 0.86 (0.50-1.48) | 0.586 |
| VEGFA | rs3025021  | C/T | 0.32 | 1.04 (0.70-1.56) | 0.841 | 1.03 (0.64-1.65) | 0.894 | 0.98 (0.63-1.51) | 0.916 | 0.79 (0.52-1.21) | 0.278 |

Abbreviation: MAF, Minor Allele Frequency; OR, odds ratio; CI, confidence interval.

Significant p-values (<0.10) are highlighted in bold.

<sup>a</sup> At each SNP, an additive model was considered. Age, sex, BMI and familiarity were included as covariates.
